# Supplementary figures and images for: Contributions of natural and anthropogenic sources to ambient ammonia in the Athabasca Oil Sands and north-western Canada
Source: Copernicus journal article supplement (doi:10.5194/acp-2017-627), 2017-10-17

## Supplemental Material

Figure A: Map of dry deposition of  $\text{NH}_3$  over wet deposition of  $\text{NH}_4^-$

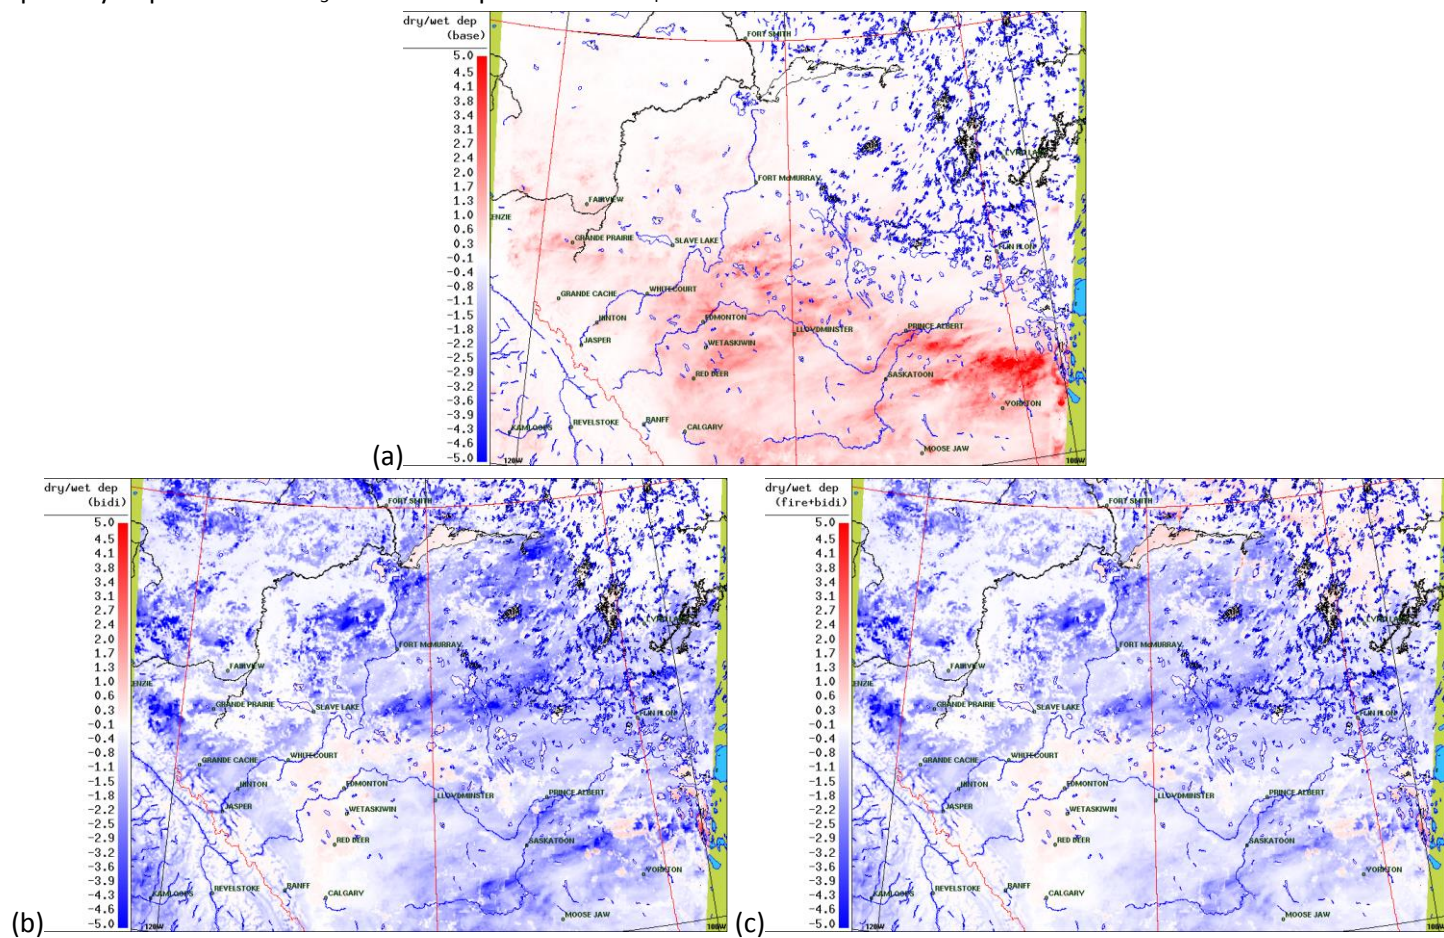

Supplement: Supplementary file 1 [file acp-2017-627-supplement.pdf]
